# Supplementary material for: Improved Health Outcomes in Patients with Systemic Lupus Erythematosus Following Early Belimumab Initiation Without Prior Immunosuppressant Use: A Real-World Descriptive Study
Source: PubMed Central journal article supplement — Rheumatol Ther. 2024 Jun 7;11(4):947–62. doi: 10.1007/s40744-024-00675-0 (PMC11264657; doi:10.1007/s40744-024-00675-0), 2024-06-07
Supplement: 40744_2024_675_MOESM1_ESM.pdf [file 40744_2024_675_MOESM1_ESM.pdf]

## **SUPPLEMENTARY MATERIALS**

# **Improved Health Outcomes in Patients With Systemic Lupus Erythematosus Following Early Belimumab Initiation Without Prior Immunosuppressant Use: A Real-World Descriptive Study**

Dr Bernard Rubin, DO MPH<sup>1\*</sup>, Dr Yan Chen PhD, MHS<sup>2</sup>, Dr Karen Worley, PhD<sup>3</sup>, Dr Brendan Rabideau, PhD<sup>2</sup>, Mr Benson Wu, MS<sup>2</sup>, Dr Rose Chang, ScD, MS, MSPH<sup>2</sup>, Dr Maral DerSarkissian, PhD<sup>2</sup>

<sup>1</sup>GSK, Medical Affairs and Immuno-inflammation, Durham, NC, USA; <sup>2</sup>Analysis Group, Boston, MA, USA; <sup>3</sup>GSK, US Value Evidence and Outcomes, Collegeville, PA, USA

\*At the time of the study

### **Corresponding author:**

Name: Karen Worley

Email: [karen.x.worley@gsk.com](mailto:karen.x.worley@gsk.com)

**Table S1. SLE disease severity algorithm**

| <b>Severity of disease</b> | <b>Criteria</b>                                                                                                                                                                                                                                                                                                                                                                                                                                                                            |
|----------------------------|--------------------------------------------------------------------------------------------------------------------------------------------------------------------------------------------------------------------------------------------------------------------------------------------------------------------------------------------------------------------------------------------------------------------------------------------------------------------------------------------|
| <b>Severe</b>              | ≥1 filled prescription for cyclophosphamide, rituximab, or OGC with a prednisone-equivalent dose of ≥60 mg/day                                                                                                                                                                                                                                                                                                                                                                             |
|                            | ≥1 non-laboratory claims <sup>a</sup> with a diagnosis listed as 'severe,' where the diagnosis occurs in any position on the claim <sup>b</sup>                                                                                                                                                                                                                                                                                                                                            |
| <b>Moderate</b>            | No filled prescriptions for cyclophosphamide, rituximab, or OGC with ≥60 mg/day of prednisone-equivalent dose                                                                                                                                                                                                                                                                                                                                                                              |
|                            | No claims with a diagnosis of a 'severe' condition                                                                                                                                                                                                                                                                                                                                                                                                                                         |
|                            | Met at least one of the following criteria at any time during the follow-up period: <ul style="list-style-type: none"> <li>• ≥1 non-laboratory claims with a diagnosis of a condition listed as 'moderate,' where the diagnosis occurs in any position on the claim<sup>b</sup></li> <li>• ≥1 filled prescription for OGC with a prednisone-equivalent dose of ≥7.5 mg/day and &lt;60 mg/day, or a prescription or for an immunosuppressive agent (other than cyclophosphamide)</li> </ul> |
| <b>Mild</b>                | Did not meet the criteria for moderate or severe disease                                                                                                                                                                                                                                                                                                                                                                                                                                   |

<sup>a</sup>Laboratory claims were defined as claims with a Place of Service value of 81 (independent laboratory); <sup>b</sup>a list of moderate and severe diagnoses and their associated disease codes are listed in

**Table S2.**

OGC, oral glucocorticoid; SLE, systemic lupus erythematosus.

**Table S2. List of moderate and severe SLE diagnoses and associated disease codes**

| Severity of disease | Diagnosis                         | ICD-9-CM                                                                      | ICD-10-CM                                                                                                                                                                                                                                                                                                                                                                                                                                                                                                                                                                                                                                                                                                                                                                                                                                                                                                                                                                                                                                                                                                                                                                                                                                                                       |
|---------------------|-----------------------------------|-------------------------------------------------------------------------------|---------------------------------------------------------------------------------------------------------------------------------------------------------------------------------------------------------------------------------------------------------------------------------------------------------------------------------------------------------------------------------------------------------------------------------------------------------------------------------------------------------------------------------------------------------------------------------------------------------------------------------------------------------------------------------------------------------------------------------------------------------------------------------------------------------------------------------------------------------------------------------------------------------------------------------------------------------------------------------------------------------------------------------------------------------------------------------------------------------------------------------------------------------------------------------------------------------------------------------------------------------------------------------|
| Severe              | Acute confusional state/psychosis | 290.11, 290.3, 290.41, 293.0, 293.1, 298.2                                    | F03.90, F03.90, F01.51, F05, F44.89                                                                                                                                                                                                                                                                                                                                                                                                                                                                                                                                                                                                                                                                                                                                                                                                                                                                                                                                                                                                                                                                                                                                                                                                                                             |
|                     | Aortitis                          | 447.6                                                                         | I77.6                                                                                                                                                                                                                                                                                                                                                                                                                                                                                                                                                                                                                                                                                                                                                                                                                                                                                                                                                                                                                                                                                                                                                                                                                                                                           |
|                     | Arterial/venous thrombosis        | 444.xx, 445.xx, 452.x, 453.xx, 362.30, 362.31, 362.32, 362.33, 362.35, 362.36 | I81, I82.0, I82.1, I82.210, I82.211, I82.220, I82.221, I82.290, I82.291, I82.3, I82.401, I82.402, I82.403, I82.409, I82.411, I82.412, I82.413, I82.419, I82.421, I82.422, I82.423, I82.429, I82.431, I82.432, I82.433, I82.439, I82.441, I82.442, I82.443, I82.449, I82.491, I82.492, I82.493, I82.499, I82.4Y1, I82.4Y2, I82.4Y3, I82.4Y9, I82.4Z1, I82.4Z2, I82.4Z3, I82.4Z9, I82.501, I82.502, I82.503, I82.509, I82.511, I82.512, I82.513, I82.519, I82.521, I82.522, I82.523, I82.529, I82.531, I82.532, I82.533, I82.539, I82.541, I82.542, I82.543, I82.549, I82.591, I82.592, I82.593, I82.599, I82.5Y1, I82.5Y2, I82.5Y3, I82.5Y9, I82.5Z1, I82.5Z2, I82.5Z3, I82.5Z9, I82.601, I82.602, I82.603, I82.609, I82.611, I82.612, I82.613, I82.619, I82.621, I82.622, I82.623, I82.629, I82.701, I82.702, I82.703, I82.709, I82.711, I82.712, I82.713, I82.719, I82.721, I82.722, I82.723, I82.729, I82.811, I82.812, I82.813, I82.819, I82.890, I82.891, I82.90, I82.91, I82.A11, I82.A12, I82.A13, I82.A19, I82.A21, I82.A22, I82.A23, I82.A29, I82.B11, I82.B12, I82.B13, I82.B19, I82.B21, I82.B22, I82.B23, I82.B29, I82.C11, I82.C12, I82.C13, I82.C19, I82.C21, I82.C22, I82.C23, I82.C29, K64.5, I67.6, N48.81, I63.6, G08, I26.01, I26.02, I26.09, I26.90, I26.92, |

|                                  |                                                                                                 |                                                                                                                                                                                                                                                                                                                                                                                                                                                                                                                                                                                                                                                                                                                                                                                                                                                                                       |
|----------------------------------|-------------------------------------------------------------------------------------------------|---------------------------------------------------------------------------------------------------------------------------------------------------------------------------------------------------------------------------------------------------------------------------------------------------------------------------------------------------------------------------------------------------------------------------------------------------------------------------------------------------------------------------------------------------------------------------------------------------------------------------------------------------------------------------------------------------------------------------------------------------------------------------------------------------------------------------------------------------------------------------------------|
|                                  |                                                                                                 | I26.99, Z86.718, I21.01, I21.02, I21.09, I21.11, I21.19, I21.21, I21.29, I21.3, I21.4, I22.0, I22.1, I22.2, I22.8, I22.9, I24.0, I26.01, I26.02, I26.09, I26.90, I26.92, I26.99, I63.00, I63.011, I63.012, I63.013, I63.019, I63.02, I63.031, I63.032, I63.033, I63.039, I63.09, I63.30, I63.311, I63.312, I63.313, I63.319, I63.321, I63.322, I63.323, I63.329, I63.331, I63.332, I63.333, I63.339, I63.341, I63.342, I63.343, I63.349, I63.39, I65.01, I65.02, I65.03, I65.09, I65.1, I65.21, I65.22, I65.23, I65.29, I65.8, I65.9, I66.01, I66.02, I66.03, I66.09, I66.11, I66.12, I66.13, I66.19, I66.21, I66.22, I66.23, I66.29, I66.3, I66.8, I66.9, I74.01, I74.09, I74.10, I74.11, I74.19, I74.2, I74.3, I74.4, I74.5, I74.8, I74.9, G95.11, H34.00, H34.01, H34.02, H34.03, H34.10, H34.11, H34.12, H34.13, H34.211, H34.212, H34.213, H34.219, K55.0, K55.069, M31.1, N28.0 |
| Aseptic meningitis               | 322.0                                                                                           | G03.0                                                                                                                                                                                                                                                                                                                                                                                                                                                                                                                                                                                                                                                                                                                                                                                                                                                                                 |
| Cardiac tamponade                | 423.3, 423.0                                                                                    | I31.4                                                                                                                                                                                                                                                                                                                                                                                                                                                                                                                                                                                                                                                                                                                                                                                                                                                                                 |
| Cranial neuropathy               | 350.x, 351.x, 352.x                                                                             | G50.x, G51.x, G52.x, G53                                                                                                                                                                                                                                                                                                                                                                                                                                                                                                                                                                                                                                                                                                                                                                                                                                                              |
| End stage renal disease          | 458.21, 585.6, 792.5, 996.56, 996.73, 996.81, V42.0, V45.1x, V56.0, V56.1, V56.2, V56.3x, V56.8 | I95.3, N18.6, R88.0, T85.691A, T82.818A, T82.828A, T82.838A, T82.848A, T82.858A, T82.868A, T82.898A, T86.10, T86.11, T86.12, Z94.0, Z99.2, Z91.15, Z49.31, Z49.01, Z49.02, Z49.31, Z49.32                                                                                                                                                                                                                                                                                                                                                                                                                                                                                                                                                                                                                                                                                             |
| Intestinal pseudo-obstruction    | 569.89                                                                                          | K59.8                                                                                                                                                                                                                                                                                                                                                                                                                                                                                                                                                                                                                                                                                                                                                                                                                                                                                 |
| Optic neuritis                   | 377.3x                                                                                          | H46.x                                                                                                                                                                                                                                                                                                                                                                                                                                                                                                                                                                                                                                                                                                                                                                                                                                                                                 |
| Pulmonary hemorrhage             | 786.3, 446.21                                                                                   | R04.2, R04.9, R04.89, M31.0                                                                                                                                                                                                                                                                                                                                                                                                                                                                                                                                                                                                                                                                                                                                                                                                                                                           |
| Stroke/transient ischemic attack | 430, 431, 432.x, 433.01, 433.11, 433.21, 433.31, 433.81, 433.91, 434.01, 434.11,                | I60.x, I61.x I62.x, I63.00, I63.011, I63.012, I63.019, I63.02, I63.031, I63.032, I63.039, I63.09, I63.10, I63.111, I63.112, I63.119, I63.12, I63.131, I63.132, I63.139, I63.19, I63.20, I63.211, I63.212, I63.219, I63.22, I63.231, I63.232, I63.239, I63.29, I63.30, I63.311, I63.312, I63.319, I63.321, I63.322,                                                                                                                                                                                                                                                                                                                                                                                                                                                                                                                                                                    |

|                 |                                                                                |                                                |                                                                                                                                                                                                                                                                                                                                                                                                                                                                  |
|-----------------|--------------------------------------------------------------------------------|------------------------------------------------|------------------------------------------------------------------------------------------------------------------------------------------------------------------------------------------------------------------------------------------------------------------------------------------------------------------------------------------------------------------------------------------------------------------------------------------------------------------|
|                 |                                                                                | 434.91, 437.1, 362.34, 435.x                   | I63.329, I63.331, I63.332, I63.339, I63.341, I63.342, I63.349, I63.39, I63.40, I63.411, I63.412, I63.419, I63.421, I63.422, I63.429, I63.431, I63.432, I63.439, I63.441, I63.442, I63.449, I63.49, I63.50, I63.511, I63.512, I63.519, I63.521, I63.522, I63.529, I63.531, I63.532, I63.539, I63.541, I63.542, I63.549, I63.59, I63.6, I63.8, I63.9, I97.810, I97.811, I97.820, I97.821, G45.0, G45.1, G45.2, G45.8, G45.9, G46.0, G46.1, G46.2, I67.841, I67.848 |
| <b>Moderate</b> | Acute pancreatitis                                                             | 577.0                                          | B25.2, K85.00, K85.01, K85.02, K85.10, K85.11, K85.12, K85.20, K85.21, K85.22, K85.30, K85.31, K85.32, K85.80, K85.81, K85.82, K85.90, K85.91, K85.92                                                                                                                                                                                                                                                                                                            |
|                 | Chorioretinitis                                                                | 363.0x, 363.10, 363.11, 363.12, 363.13, 363.20 | H30.001, H30.002, H30.003, H30.009, H30.011, H30.012, H30.013, H30.019, H30.021, H30.022, H30.023, H30.029, H30.031, H30.032, H30.033, H30.039, H30.041, H30.042, H30.043, H30.049, H30.101, H30.102, H30.103, H30.109, H30.111, H30.112, H30.113, H30.119, H30.121, H30.122, H30.123, H30.129, A18.53, H30.131, H30.132, H30.133, H30.139, H30.891, H30.892, H30.893, H30.899, H30.90, H30.91, H30.92, H30.93                                                   |
|                 | Demyelinating syndrome/acute inflammatory demyelinating polyradiculoneuropathy | 357.81, 357.82, 341.8, 341.9                   | G61.81, G62.81, G36.1, G36.8, G37.1, G37.2, G3.4, G37.8, G36.9, G37.9                                                                                                                                                                                                                                                                                                                                                                                            |
|                 | Episcleritis/scleritis                                                         | 379.0x                                         | H15.001, H15.002, H15.003, H15.009, H15.101, H15.102, H15.103, H15.109, H15.111, H15.112, H15.113, H15.119, H15.121, H15.122, H15.123, H15.129, H15.011, H15.012, H15.013, H15.019, H15.051, H15.052, H15.053, H15.059, H15.041, H15.042, H15.043, H15.049, H15.021, H15.022, H15.023, H15.029, H15.031,                                                                                                                                                         |

|  |                               |                                |                                                                                                                                                                                                                                                                                                                                                                                                                                                                                                                                                                                 |
|--|-------------------------------|--------------------------------|---------------------------------------------------------------------------------------------------------------------------------------------------------------------------------------------------------------------------------------------------------------------------------------------------------------------------------------------------------------------------------------------------------------------------------------------------------------------------------------------------------------------------------------------------------------------------------|
|  |                               |                                | H15.032, H15.033, H15.039, A18.51, H15.091, H15.092, H15.093, H15.099                                                                                                                                                                                                                                                                                                                                                                                                                                                                                                           |
|  | Hemolytic anemia              | 283.0, 283.9                   | D59.0, D59.1, D59.9                                                                                                                                                                                                                                                                                                                                                                                                                                                                                                                                                             |
|  | Hepatitis (non-viral)         | 571.4x                         | K73.9, K73.0, K75.4, K73.1, K73.2, K73.8                                                                                                                                                                                                                                                                                                                                                                                                                                                                                                                                        |
|  | Ischemic necrosis of bone     | 733.4x                         | M87.x, M90.5x                                                                                                                                                                                                                                                                                                                                                                                                                                                                                                                                                                   |
|  | Lupus enteritis/colitis       | 558.9                          | K52.29, K52.3, K52.831, K52.832, K52.838, K52.839, K52.89, K52.9                                                                                                                                                                                                                                                                                                                                                                                                                                                                                                                |
|  | Mononeuropathy/polyneuropathy | 354.x, 355.x, 357.1, 357.4     | G56.x, G57.x, G58.7, G58.0, G58.8, G58.9, G59, E08.41, E09.41, E10.41, E11.41, E13.41, G63, M05.5x, A52.15, G63, G65.0, G65.1, G65.2, M34.83                                                                                                                                                                                                                                                                                                                                                                                                                                    |
|  | Myelopathy                    | 336.3, 323.82, 341.20, 341.21  | G99.2, G04.89, G37.3                                                                                                                                                                                                                                                                                                                                                                                                                                                                                                                                                            |
|  | Myocarditis                   | 422.0, 422.90, 422.99          | A18.84, I41, I40.9, I40.8                                                                                                                                                                                                                                                                                                                                                                                                                                                                                                                                                       |
|  | Nephritis                     | 580.xx, 582.xx, 583.xx, 581.xx | N00.x, N01.x, N03.x, N08, N05.2, N06.2, N07.2, N05.3, N05.4, N05.5, N06.3, N06.4, N06.5, N07.3, N07.4, N07.5, N05.9, N17.1, N17.2, E09.21, E09.22, E09.29, M32.14, M32.15, M35.04, N16, N05.0, N05.1, N05.6, N05.7, N05.8, N06.0, N06.1, N06.6, N06.7, N06.8, N07.0, N07.1, N07.6, N07.7, N07.8, N14.0, N14.1, N14.2, N14.3, N14.4, N15.0, N15.8, N06.9, N07.9, N15.9, N04.4, N02.1, N02.2, N02.3, N04.1, N04.2, N02.4, N02.5, N02.6, N02.7, N04.3, N04.4, N04.5, N04.6, N02.0, N04.0, B52.0, E08.21, E08.22, E08.29, E09.21, E09.22, E09.29, N02.8, N04.7, N04.8, N02.9, N04.9 |
|  | Pericarditis                  | 420.0, 420.90, 423.2           | A18.84, I32, M32.12, I30.1, I30.9, I31.1                                                                                                                                                                                                                                                                                                                                                                                                                                                                                                                                        |
|  | Pleurisy/pleural effusion     | 511.0, 511.89, 511.9           | J86.9, J92.0, J92.9, J94.1, J94.8, J94.9, R09.1, J90, J94.0, J94.2,                                                                                                                                                                                                                                                                                                                                                                                                                                                                                                             |

|  |                                                                                           |                                                                                                                                                              |                                                                                                                                                                                                                                  |
|--|-------------------------------------------------------------------------------------------|--------------------------------------------------------------------------------------------------------------------------------------------------------------|----------------------------------------------------------------------------------------------------------------------------------------------------------------------------------------------------------------------------------|
|  |                                                                                           |                                                                                                                                                              | J94.8, J91.8                                                                                                                                                                                                                     |
|  | Pseudotumor cerebri                                                                       | 377.01                                                                                                                                                       | H47.11                                                                                                                                                                                                                           |
|  | Renal impairment other than nephritis or end stage renal disease (other renal impairment) | 285.21, 403.01, 403.11, 403.91, 404.02, 404.03, 404.12, 404.13, 584.x, 585, 585.1, 585.2, 585.3, 585.4, 585.5, 585.9, 588.xx, 593.71, 593.72, 593.73, E879.1 | D63.1, I12.0, I13.11, I13.2, I13.11, I13.2, N17.0, N17.1, N17.2, N17.8, N17.9, N18.1, N18.2, N18.3, N18.4, N18.5, N18.9, N25.0, N25.1, N25.81, N25.89, N25.9, N13.721, N13.731, N13.722, N13.732, N13.729, N13.739, N13.9, Y84.1 |
|  | Seizure                                                                                   | 780.3, 780.39                                                                                                                                                | R56.00, R56.01, R56.1, R56.9                                                                                                                                                                                                     |
|  | Uveitis                                                                                   | 364.00, 364.01, 364.02, 364.04, 364.05, 364.10, 364.11, 364.3                                                                                                | H20.00, H20.011, H20.012, H20.013, H20.019, H20.021, H20.022, H20.023, H20.029, H20.041, H20.042, H20.043, H20.049, H20.051, H20.052, H20.053, H20.059, H20.10, H20.11, H20.12, H20.13, A18.54, H20.9                            |
|  | Vasculitis (excluding aortitis)                                                           | 362.18, 437.4, 446.20, 446.29                                                                                                                                | H35.061, H35.062, H35.069, I67.7, I68.2, M31.0                                                                                                                                                                                   |

ICD-9-CM, International Classification of Diseases, 9th Revision, Clinical Modification; ICD-10-CM, International Classification of Diseases, 10th Revision, Clinical Modification; SLE, systemic lupus erythematosus.

**Table S3. Definition of SLE flares by severity**

| Severity of disease | Criteria                                                                                                                                                                                                                                                                                                                                                                                                                                                                                                                                                                                                                                                            |
|---------------------|---------------------------------------------------------------------------------------------------------------------------------------------------------------------------------------------------------------------------------------------------------------------------------------------------------------------------------------------------------------------------------------------------------------------------------------------------------------------------------------------------------------------------------------------------------------------------------------------------------------------------------------------------------------------|
| <b>Severe</b>       | <p>Meets <u>≥1</u> of the following criteria:</p> <ul style="list-style-type: none"> <li>• Initiation<sup>a</sup> of <i>either</i> an OGC with prednisone-equivalent dose of &gt;40 mg/day or cyclophosphamide</li> <li>• Admission for an inpatient stay with a primary diagnosis of SLE</li> <li>• Admission for an inpatient stay with a severe SLE-related condition: <ul style="list-style-type: none"> <li>○ Acute confusional state/psychosis, arthritis/arthralgia<sup>b</sup>, aortitis, arterial/venous thrombosis, aseptic meningitis, cardiac tamponade, cranial neuropathy, dry eye/tear film insufficiency, intestinal pseudo-</li> </ul> </li> </ul> |

|                 |                                                                                                                                                                                                                                                                                                                                                                                                                                                                                                                                                                                                                                                                                                                                                                                                                                                                                                                                                                                                                                                                                                                                                                                                                                                                                                                                                                                                                   |
|-----------------|-------------------------------------------------------------------------------------------------------------------------------------------------------------------------------------------------------------------------------------------------------------------------------------------------------------------------------------------------------------------------------------------------------------------------------------------------------------------------------------------------------------------------------------------------------------------------------------------------------------------------------------------------------------------------------------------------------------------------------------------------------------------------------------------------------------------------------------------------------------------------------------------------------------------------------------------------------------------------------------------------------------------------------------------------------------------------------------------------------------------------------------------------------------------------------------------------------------------------------------------------------------------------------------------------------------------------------------------------------------------------------------------------------------------|
|                 | obstruction, end stage renal disease, low white blood cell count (leukopenia, neutropenia, lymphocytopenia) <sup>b</sup> , lymph node enlargement <sup>b</sup> , myalgia/myositis <sup>b</sup> , optic neuritis, pulmonary hemorrhage, rash <sup>b</sup> , stroke/transient ischemic attack, urticaria <sup>b</sup>                                                                                                                                                                                                                                                                                                                                                                                                                                                                                                                                                                                                                                                                                                                                                                                                                                                                                                                                                                                                                                                                                               |
| <b>Moderate</b> | <p>Meets <u>≥1</u> of the following criteria:</p> <ul style="list-style-type: none"> <li>• Initiation<sup>a</sup> of either an OGC with a prednisone-equivalent dose of ≥7.5 mg/day and ≤40 mg/day, or a prescription for an immunosuppressive agent (other than cyclophosphamide)</li> <li>• A claim for an emergency department visit with a primary diagnosis of SLE with no inpatient admission within 1 day</li> <li>• A claim for an emergency department or office visit (excluding visits associated with belimumab administration) with a primary or secondary diagnosis for the following moderate SLE-related conditions: <ul style="list-style-type: none"> <li>○ Arthritis/arthritis<sup>b</sup>, chorioretinitis, demyelinating syndrome/acute inflammatory demyelinating polyradiculoneuropathy, dry eye/tear film insufficiency<sup>b</sup>, episcleritis/scleritis, hemolytic anemia, hepatitis (non-viral), ischemic necrosis of bone, nephritis, other renal impairment, low white blood cell count (leukopenia, neutropenia, lymphocytopenia)<sup>b</sup>, lupus enteritis/colitis, lymph node enlargement<sup>b</sup>, mononeuropathy/polyneuropathy, myalgia/myositis<sup>b</sup>, myelopathy, myocarditis, pericarditis, pleurisy/pleural effusion, pseudotumor cerebri, rash<sup>b</sup>, seizure, urticaria<sup>b</sup>, uveitis, vasculitis (excluding aortitis)</li> </ul> </li> </ul> |
| <b>Mild</b>     | <p>Initiation<sup>a</sup> of any of the following:</p> <ul style="list-style-type: none"> <li>• Hydroxychloroquine or another antimalarial</li> <li>• OGC with prednisone-equivalent dose<sup>b</sup> of ≤7.5 mg/day</li> <li>• Non-immunosuppressive therapy (e.g., NSAIDs, androgens)</li> </ul>                                                                                                                                                                                                                                                                                                                                                                                                                                                                                                                                                                                                                                                                                                                                                                                                                                                                                                                                                                                                                                                                                                                |

<sup>a</sup>Initiation was categorized as filling of a prescription >60 days after the previous prescription fill date (the modified definition of flare categorized initiation of an immunosuppressant as filling of a prescription for an immunosuppressant >60 days after the supply of the former prescription ended);

<sup>b</sup>included in both 'moderate' and 'severe' flare severity definitions.

NSAIDs, non-steroidal anti-inflammatory drugs; OGC, oral glucocorticoid; SLE, systemic lupus erythematosus.



**Table S4. Medical conditions included in the definition of organ damage [1]**

| <b>System organ class</b>  | <b>Medical condition</b>                                                                                   |
|----------------------------|------------------------------------------------------------------------------------------------------------|
| <b>Cardiovascular</b>      | Valvular disease                                                                                           |
|                            | Cardiomyopathy (ventricular dysfunction)                                                                   |
|                            | Angina or coronary artery bypass                                                                           |
|                            | Myocardial infarction                                                                                      |
|                            | Pericarditis or pericardiectomy                                                                            |
| <b>Gastrointestinal</b>    | Any history of stricture or upper gastrointestinal tract surgery                                           |
|                            | Mesenteric insufficiency                                                                                   |
|                            | Pancreatic insufficiency requiring enzyme replacement or with pseudocyst                                   |
|                            | Chronic peritonitis                                                                                        |
|                            | Any history of infarction or resection of bowel below duodenum, spleen, liver, or gallbladder of any cause |
| <b>General</b>             | Diabetes                                                                                                   |
|                            | Malignancy (excluding dysplasia)                                                                           |
| <b>Musculoskeletal</b>     | Avascular necrosis                                                                                         |
|                            | Osteoporosis with fracture or vertebral collapse                                                           |
|                            | Muscle atrophy or weakness                                                                                 |
|                            | Osteomyelitis                                                                                              |
|                            | Ruptured tendon                                                                                            |
|                            | Deforming or erosive arthritis (including reducible deformities)                                           |
| <b>Neuropsychiatric</b>    | Cranial or peripheral neuropathy excluding optic                                                           |
|                            | Seizures                                                                                                   |
|                            | Any history of cerebrovascular accident                                                                    |
|                            | Cognitive impairment or major psychosis                                                                    |
|                            | Transverse myelitis                                                                                        |
| <b>Ocular</b>              | Cataract glaucoma                                                                                          |
|                            | Retinal damage or optic atrophy                                                                            |
| <b>Peripheral vascular</b> | Venous thrombosis with swelling, ulceration, or venous stasis                                              |
|                            | Minor tissue loss (pulp space)                                                                             |
|                            | Significant tissue loss                                                                                    |
|                            | Claudication                                                                                               |
| <b>Reproductive</b>        | Premature gonadal failure                                                                                  |
| <b>Pulmonary</b>           | Pleural fibrosis                                                                                           |
|                            | Pulmonary hypertension                                                                                     |
|                            | Pulmonary fibrosis                                                                                         |
|                            | Pulmonary infarction                                                                                       |
| <b>Renal</b>               | Chronic kidney disease                                                                                     |
|                            | End-stage renal disease                                                                                    |
|                            | Nephrotic syndrome                                                                                         |
| <b>Skin</b>                | Scarring chronic alopecia                                                                                  |
|                            | Skin ulceration                                                                                            |
|                            | Extensive scarring of panniculus other than scalp and pulp space                                           |

## **SUPPLEMENTARY REFERENCES**

1. Gladman D, Ginzler E, Goldsmith C, et al. The development and initial validation of the Systemic Lupus International Collaborating Clinics/American College of Rheumatology damage index for systemic lupus erythematosus. *Arthritis Rheum.* 1996;39(3):363-9.
